# Supplementary material for: A Cross-National Comparative Policy Analysis of the Blockchain Technology Between the USA and China
Source: Preprints.org preprint supplement (doi:10.20944/preprints202103.0250.v1), 2021-03-09
Supplement: Supplementary file 1 [file supplementary]

## Sheet: China blockchain policy
China Blockchain Technology and Industry Development Forum, China blockchain technology and application development white paper (2016).
Innovation Policy tools	China blockchain technology and application development white paper (2016)	Extracted policy terms	Source
(1) Public enterprise	2016年2月，中国人民银行行长周小川在谈到数字货币相关问题时曾提及...人民银行部署了重要力量研究探讨区块链应用技术。	Promote the development of blockchain technology and applications	2.3.1
	中国互联网金融协会也成立了区块链研究工作组，深入研究区块链技术在金融领域的应用及影响。	Eestablishes a blockchain research working group in financial sector	2.2.7
(2) Scientific and technical development	当前，我国正在加快实施智能制造工程，积极推动制造企业利用新一代信息技术提升研发设计、生产制造、经营管理等环节的数字化、网络化水平，实现智能化转型，以重塑制造业竞争新优势。	Use information technology to enhance the digitalization	3.5
	广泛收集需求，充分考虑可行性高的核心技术及其可能的扩展或改变，需要将区块链系统的开发经验与对传统业务模式的理解这两者相结合。	Combine blockchain systems and traditional business models	4.6.2
	对目标系统和底层技术平台需形成完整、准确、清晰、具体的要求，充分进行可行性验证，确保多个参与者形成一致认可。	Form the requirements for the target system and the underlying technology platform	4.6.2
	重点支持关键技术攻关、系统解决方案研发等。	Focus on supporting key technology research and system solution research and development.	6
(3) Education	鼓励和支持重点高校设置区块链专业课程。	Support key colleges and universities to set up blockchain professional courses	6.4
	推动重点企业和高校联合，建设区块链人才实训基地，加快培养区块链专业技术人才。	Promote the joint efforts of key enterprises and universities for blockchain talent training base	6.4
	支持和推动国内重点培训机构，加强与重点企业合作，积极培训区块链技术开发人才	Support and promote key domestic training institutions, strengthen cooperation with key enterprises, and actively train blockchain technology development talents	6.4
	结合国家专业技术人才知识更新工程、企业经营管理人才素质提升工程、高技能人才振兴计划等，加强区块链专业技术人才和高端人才培养。	Strengthen the blockchain professional and technical personnel for high-end talent training	6.4
(4) Information service	重点支持关键技术攻关、重大示范工程、“双创”平台建设、系统解决方案研发和公共服务平台建设等。	Support demonstration bases and public service platform construction	6.1
	我们将学习借鉴国际开源社区建设和运用模式，通过论坛成员单位加强合作，建设我国区块链开源社区，提高区块链技术的安全可靠水平...。	Build blockchain open source community	6.2
	建议具备条件的省市，推动具备条件的软件和信息服务业示范基地，建设面向中小企业创业创新的孵化平台。	Support demonstration bases and public service platform construction	6.2
(5) Financial	重点支持重大示范工程。	Focus on supporting major demonstration projects.	6.1
	设立投资基金，加快投融资和并购	Establish investment funds to accelerate investment, financing and mergers and acquisitions	6.2
	为各级政府扶持中小企业发展提供支持	Supporting the development of SMEs at all levels of government	6.2
(6) Taxation
(7) Legal regulatory	基础标准	Basic standard	5.3.1
	业务和应用标准	Business and application standards	5.3.2
	过程和方法标准	Process and method standards	5.3.3
	可信和互操作标准	Trusted and interoperable standards	5.3.4
	信息安全标准	Information security standard	5.3.5
	以标准体系框架为基础，通过研究分析信息技术和通信领域已有标准，结合区块链技术和应用发展趋势，提出直接反映区块链特征，并能引导和规范区块链相关的技术和产品研发以及服务设计、部署和交付，有效解决数据交换、供应商绑定、信息安全和隐私保护等问题的21个标准化重点方向，以指导具体标准的立项和制定。对尚未纳入标准研制方向但在综合标准化体系框架中列出的，是下一步开展标准化工作的重点研究方向。	Standardize the comprehensive system listed in the framework	5.3
	建议结合深入推进简政放权、放管结合、优化服务改革等，放宽市场准入限制，加强事中事后监管	Relax market access restrictions	6.1
(8) Political	2016年9月9日，中国人民银行副行长范一飞...提出，各机构应主动探索系统架构转型，积极研究建立灵活、可延展性强、安全可控的分布式系统架构，同时应加强对区块链等新兴技术的持续关注，不断创新服务和产品，提升普惠金融水平。	Promote the development of blockchain technology and applications	2.3.1
	自“十二五”被确立为七大战略性新兴产业之一以来，我国新一代信息技术的发展迅速，逐步成为各行业深化信息技术应用的方向。区块链技术和应用的发展需要云计算、大数据、物联网等新一代信息技术作为基础设施支撑，同时区块链技术和应用发展对推动新一代信息技术产业发展具有重要的促进作用。	Promote next-generation information technology	2.4
	标准体系预研： 系统分析区块链技术和产业发展趋势，以及应用要求，并根据引导和规范区块链技术和产业发展的事中事后监管要求，开展标准体系预研，指导成体系成系统开展标准研制工作。主要成果为《区块链标准体系研究报告》。	Establish blockchain standard system	5.4
	标准试点推广： 根据标准研制进展情况，由区块链技术和产业发展论坛成员单位按照自愿原则，在区块链底层开发平台建设、区块链应用研发以及业务拓展过程中，开展标准验证工作。条件成熟时，选择具备条件的省市或行业开展试点工作。在此过程中将收集到具体的应用需求，为区块链标准体系的持续改进提供必要的支持。	Establish blockchain standard system	5.4
	区块链标准研制的策略将积极贯彻落实国务院《深化标准化工作改革方案》（国发〔2015〕13号），优先依托区块链技术和产业发展论坛，制定和推广团体标准，同步推进国际标准化工作。待条件成熟时，及时转化制定为国家标准或行业标准，从而建立政府主导制定与市场自主制定的标准协同发展、协调配套的区块链标准体系。	Establish blockchain standard system	5.4
	＊跟踪国际标准化新进展和新成果，研究国际标准体系，识别区块链标准化的新动向、新需求和新机会。	Accelerate the development of international standards and reference architectures	5.5.2
	＊加快制定参考架构、区块数据格式等基础标准...，推动我国优势技术转化为国际标准。	Establish blockchain standard system	5.5.2
	借鉴发达国家和地区的先进做法，结合我国区块链技术和应用发展情况，及时出台区块链技术和产业发展扶持政策	Promote next-generation information technology	6.1
	建议国内重点企业、科研、高校和用户单位加强联合，加快共识机制、可编程合约、分布式存储、数字签名等核心关键技术攻关。	Promote next-generation information technology	6.2
	建议大企业加大研发投入力度，建设区块链通用开发平台，降低区块链技术研发和应用成本。	Build a general development platform for blockchains	6.2
	鼓励和支持重点企业、中小企业积极参与国际区块链开源社区，提升影响力和话语权。	Accelerate the development of international standards and reference architectures	6.5
	鼓励和支持具备条件的大企业充分利用市场、资金和人才优势，建立多种形式的国际民间交流合作机制，积极推动我国具有竞争优势的区块链技术和产品走出去。	Accelerate the development of international standards and reference architectures	6.5
	各级政府结合《中国制造2025》、“互联网+”行动指导意见、制造业与互联网融合发展等系列国家战略的实施，聚焦典型应用需求，组织重点企业，研究提出区块链应用示范方案。	Build a general development platform for blockchains	6.3
	支持大企业牵头、产学研用联合，选择有条件的地区和行业，开展区块链应用示范，探索形成区块链应用推广模式，营造应用环境。	Build a general development platform for blockchains	6.3
(9) Procurement	经过验证试点后的标准，可视情况进行应用推广，应用推广方式包括论坛、专题讲座、媒体宣传、年会、支持政府采购等。	Application standards support for government procurement	5.4
(10) Public services	提升为企业服务的能力和水平，营造有利于加快区块链发展的环境	Enhance the service to the enterprise	6.1
	促进技术与平台充分接受市场的检验，推动商用级、企业级或金融级的应用场景诞生，最终实现促进产业变革、切实为实体经济服务的目标。	Promote the scenarios of commercial, enterprise or financial application	4.6.2
	通过开源社区促进区块链生态的形成与完善，增强企业间的技术交流和合作，应对区块链技术的快速升级换代。	Fform blockchain ecology of technical exchanges and cooperation among enterprises	4.6.2
(11) Commercial
(12) Overseas agent	借助中美、中欧战略对话机制，支持大企业围绕关键技术攻关、“双创”平台建设、标准制定以及应用示范等，开展技术交流与合作。	With China-US and China-Europe mechanism to support enterprises	6.5
	积极参与区块链领域国际标准化权威组织的工作，争取更多话语权。	Lead or /participate bloakchain international standardization organization	5.5.2
	加大力度构建具有国际先进水平的区块链标准体系，并向国际推广。	Lead or /participate bloakchain international standardization organization	5.5.2
	主导或实质参与区块链国际标准制修订工作，推动我国优势技术转化为国际标准。	Build blockchain standard to international community	5.5.2

## Sheet: USA blockchain policy
The Joint Economic Committee Congress of the United States (2018) , “The 2018 Joint Economic Report”
Innovation Policy tools	The 2018 Joint Economic Report	Extracted policy terms	Source (Chapter 9)
(1) Public enterprise	Health care providers, patients, and policymakers continue searching for portable and secure ways to store medical records digitally. Developers, companies, and governments recognize the potential and have already starting to implement blockchains for many different uses.	Implement blockchains for private medical data	Blockchain Innovations
(2) Scientific and technical development
(3) Education
(4) Information service
(5) Financial
(6) Taxation	Representative Schweikert, along with Colorado Representative Jared Polis, introduced the Cryptocurrency Tax Fairness Act of 2017. The bill would essentially create a de minimis reporting exemption for virtual currency purchases under $600. The bill has yet to become law, but as virtual currencies’ popularity and technical abilities improve, more bills on this topic will likely be introduced.	Virtual currency businesses file as money transmitters (still need to enact the proposed legislation)	Taxation
(7) Legal regulatory	Cryptocurrencies created involve money transmission laws. Historically, States regulated and licensed money transmitters. State licensing requires those operating across State lines to obtain a license to operate in all States and territories except Montana.	Regulate and licensd money transmitters	Money Transmission
	As methods of theft, espionage, and vandalism shift from physical toward virtual—including data and intellectual property—law enforcement’s role in fighting property crime remains vital. The economy benefits from protecting private property and contract integrity. blockchain—that is not only nearly invulnerable to cyberattack but revolutionizing the way the world conducts commerce and shares info…	Protect private property and contract integrity	INTRODUCTION
	Cryptocurrencies, ICOs, and their exchanges present novel regulatory challenges, led to instances of new products running afoul of America’s current regulatory framework .The market expanded with a light regulatory touch, and the well-publicized nefarious actions in this space prompted regulators to act.	Protect private property and contract integrity	REGULATORY QUESTIONS
	Rather than covering the plethora of regulatory challenges cryptocurrencies and blockchain present, the Response focus on securities regulations, money transmission laws, taxation definitions, and possible future regulatory action.	Protect private property and contract integrity	REGULATORY QUESTIONS
	American regulators spent years convening working groups, watching developments, and conducting research to ensure they understood how these new technologies operated and how they could be regulated.	Conduct regulated research	REGULATORY QUESTIONS
	The SEC found the DAO should have been defined as a security under this test. The SEC started more enforcement actions against new tokens for both securities registration issues and fraud.	Actions for securities registration issues and fraud	Securities Regulation
	Taxpayers who hold virtual currency as an investment must treat appreciation like capital gain. The IRS clarified that mining awards should be included in users’ gross income.	Conduct regulated research	Taxation
	The Uniform Law Commission, a nonpartisan commission focused on creating consistent state laws, drafted and approved legislative text that would clearly define what virtual currency businesses need to file as money transmitters.	Regulate and license money transmitters	Money Transmission
	Solving the challenges cryptocurrencies and blockchains present will require unique solutions that balance the needs of consumer protection, security, and entrepreneurship. NIST and HHS continue working towards standards that promote compliance without needlessly halting innovation. For cryptocurrencies and blockchain to further thrive, policymakers will need collaborative and innovative solution…	Working toward cryptocurrencies and blockchains compliance standards	Future Regulatory Questions
(8) Political	These new blockchain products attempt to comply with the current system and work together with regulators. The new products range from coordinating payment (healthnexus), monitoring and rewarding patients for following clinical recommendations (RoboMed Network), tracking pharmaceuticals along the supply chain (MediLedger), and even identifying specific supply chain problems such as those associat…	Comply blockchain products with system and regulators	Blockchain Innovations
	The Cryptocurrency Tax Fairness Act of 2017, the bill would essentially create a de minimis reporting exemption for virtual currency purchases under $600. The bill has yet to become law, but as virtual currencies’ popularity and technical abilities improve, more bills on this topic will be introduced.	Virtual currency businesses file as money transmitters	Taxation
(9) Procurement	New blockchain products attempt to comply with the current system and even work together with regulators. The new products range from coordinating payment (healthnexus), monitoring and rewarding patients for following clinical recommendations (RoboMed Network), tracking pharmaceuticals along the supply chain (MediLedger), and even identifying specificsupply chain problems such as those associated…	New blockchain products comply with the current system and regulators	Blockchain Innovations
	Smart meters throughout the neighborhood would buy and sell power generated from these alternative sources as it enters the grid. Governments started working with energy providers to explore blockchain’s use.The Department of Energy partnered with BlockCypher to demonstrate how blockchains could facilitate a smarter energy grid.	Facilitate a smarter energy grid with blockchain’s use	Blockchain Innovations
	From applications ranging from management of the electrical grid and utilities to how companies manage global supply chains, the potential for blockchain is truly revolutionary. For example, power plants could record the electricity they generates on a blockchain as available for purchase. Utilities could then purchase the power, and the blockchain would record the purchase and the transfer. Fina…	Facilitate a smarter energy grid with blockchain’s use	Blockchain Innovations
	Schweikert coordinates with institutions like the Massachusetts Institute of Technology and the National Institute of Standards and Technology (NIST) to develop encryption standards that would protect Americans’ private medical data.	(MIT and NIST) develop encryption standards for medical data protection	Blockchain Innovations
(10) Public services	The Internal Revenue Service (IRS) issued a guidance document to answer frequently asked questions. The IRS classified virtual currencies as property and not currency, but noted they should not be considered foreign currency for tax purposes.	Issues the blockchain guidance documents	Taxation
	Cryptocurrencies, ICOs, and their exchanges present novel regulatory challenges. The Response will focus on securities regulations, money transmission laws, taxation definitions, and possible future regulatory action.	Convene working groups focus on securities regulations, money transmission laws, taxation definitions	REGULATORY QUESTIONS
	in 2016 the United States Department of Health and Human Services (HHS) announced the “Use of Blockchain in Health IT and Health- Related Research” Ideation Challenge. The initiative requested white papers examining how blockchain technology could change health information technology.	Examine the use of blockchain in health IT and related research	Blockchain Innovations
	The SEC launched an investigation into the DAO to determine if it should have been defined as a security subject to SEC regulation.	Investigate and define security regulation	Securities Regulation
	Solving the challenges cryptocurrencies and blockchains present will require unique solutions that balance the needs of consumer protection, security, and entrepreneurship. While it is impossible to determine precisely which rules, regulations, and guidance will result from this process. Regulatory agencies will need to coordinate to ensure they do not work at cross purposes.	Coordinate the need for financial products and transactions	Future Regulatory Questions
	The CFTC and SEC, along with other federal and state regulators and criminal authorities, will continue to work together to bring transparency and integrity to these markets and, importantly, to deter and prosecute fraud and abuse.	Deter and prosecute fraud and abuse	Future Regulatory Questions
(11) Commercial
(12) Overseas agent

## Sheet: China_USA Summary
	No.	1	2	3	4	5	6	7	8	9	10	11	12	total
	Innovation Policy tools	Public enterprise	Scientific and technical	Education	Information	Financial	Taxation	Legal and regulatory	Political	Procurement	Public services	Commercial	Overseas agent
	China	2	4	4	3	3	0.02	7	14	1	3	0.02	4	45.04
	China	0.0444444	0.0888889	0.0888889	0.0666667	0.0666667	0	0.155556	0.311111	0.0222222	0.0666667	0	0.0888889	1
	USA	1	0.01	0.01	0.01	1	9	2	4	6	0.01	0.01	0.01	23.06
	USA	0.0434783	0	0	0	0	0.0434783	0.391304	0.0869565	0.173913	0.26087	0	0	1
								Categories	Supply Side	Environmental Side	Demand Side
								China	0.288889	0.533333	0.177778
								USA	0.0434783	0.521739	0.434783

## Sheet: Summary Tables
	Categories\China	Policy tools	Policy items	Policy tools Ratio	Categories Ratio
	Supply Side	(1) Public enterprise	2	0.0444444	0.288889
		(2) Scientific and technical development	4	0.0888889
		(3) Education	4	0.0888889
		(4) Information service	3	0.0666667
	Environmental Side	(5) Financial	3	0.0666667	0.533333
		(6) Taxation	0	0
		(7) Legal regulatory	7	0.155556
		(8) Political	14	0.311111
	Demand Side	(9) Procurement	1	0.0222222	0.177778
		(10) Public services	3	0.0666667
		(11) Commercial	0	0
		(12) Overseas agent	4	0.0888889
	Categories\USA	Policy tools	Policy items	Policy tools Ratio	Categories Ratio
	Supply Side	(1) Public enterprise	1	0.0434783	0.0434783
		(2) Scientific and technical development	0	0
		(3) Education	0	0
		(4) Information service	0	0
	Environmental Side	(5) Financial	0	0	0.521739
		(6) Taxation	1	0.0434783
		(7) Legal regulatory	9	0.391304
		(8) Political	2	0.0869565
	Demand Side	(9) Procurement	4	0.173913	0.434783
		(10) Public services	6	0.26087
		(11) Commercial	0	0
		(12) Overseas agent	0	0
	Categories\EU	Policy tools	Policy items	Policy tools Ratio	Categories Ratio
	Supply Side	(1) Public enterprise	3	0.09375	0.09375
		(2) Scientific and technical development	0	0
		(3) Education	0	0
		(4) Information service	0	0
	Environmental Side	(5) Financial	0	0	0.65625
		(6) Taxation	0	0
		(7) Legal regulatory	13	0.40625
		(8) Political	8	0.25
	Demand Side	(9) Procurement	0	0	0.25
		(10) Public services	8	0.25
		(11) Commercial	0	0
		(12) Overseas agent	0	0
